# Supplementary material
Source: publisher figshare collection journal article supplement (https://sage.figshare.com/ndownloader/files/14949296)
Supplement: Supplementary file 1 [file 14949296]

## Sheet: Supplementary Table guide
Supplementary Table Guide:
Supplementary Table 1: The information of samples.
Supplementary Table 2: The abundance of species between the control group and the model group.
Supplementary Table 3: The abundance of species between the model group and the treatment group.
Supplementary Table 4: The abundance of Bacteroides and the level of serum interleukin-10 (IL-10).

## Sheet: Supplementary Table 1
Supplementary Table 1: The inofrmation of samples.
Number	Group	Weight														The number of different sizes of tumors					Largest and minor diameters of the largest tumor(mm)	The longest diameter of the largest tumor(mm)	The level of serum IL-10
		2016-05-20	2016-05-27	2016-06-03	2016-06-10	2016-06-17	2016-06-24	2016-07-01	2016-07-08	2016-07-15	2016-07-22	2016-07-29	2016-08-01	2016-08-08	Average	<2mm	2-5mm	5-8mm	>8mm	Total
1	treatment	31.76	33.12	32.78	33.1	32	32	30.5	30.3	30.2	29.7	28.8	27.8	28.3	30.7969	6	8	6	4	24	（17.24*11.85）	17.24	5.707
2	treatment	31.93	32.52	31.34	31.48	31.4	30.33	30	29.2	28.5	27.5	26.6	26.3	26.6	29.5154	4	3	5	7	19	（22.14*11.70）	22.14	19.406
3	model	31.15	30.88	30.42	32.23	32	31.98	31.5	31.1	30.6	30.1	28.3	28.1	27.5	30.4508	1	4	1	3	9	（19.2*15.4）	19.2	10.106
4	model	29.73	29.21	30.28	31.21	30.8	30.78	30.5	30.3	29.8	29.1	28	27.4	26.6	29.5162	0	5	6	5	16	（15.32*13.08）	15.32	22.413
5	treatment	34.26	33.97	32.08	32.92	32.6	32.6	33.1	33.9	34.2	33.5	33.9	34.2	34.1	33.4869	7	6	3	5	21	（12.49*9.37）	12.49	20.032
6	treatment	34.16	34.35	33.55	33.47	33.4	33.84	33.7	34.2	34	35.2	34.9	34.7	34.2	34.1285	4	6	8	4	22	（18.29*14.27）	18.29	8.491
7	treatment	32.8	27.38	30.52	30.99	31	32.1	31.8	33.3	30.3	31.5	32.3	32.7	32.9	31.5069	9	9	3	2	23	（10.77*8.77）	10.77	8.547
8	model	31.97	31.92	32.23	32.25	32.2	33.2	32.8	33.7	33.3	31.9	30.2	29.2	28.5	31.7977	1	2	6	0	9	（10.95*9.88)	10.95	12.333
9	model	32.48	32.7	31.96	32.25	31.6	32.3	31.9	28.3	32.6	32.9	33	32.4	31.5	31.9915	5	2	1	2	10	（9.65*8.76）	9.65	10.05
10	treatment	31.25	31.13	31.43	31.98	31.7	32.6	32.3	32.7	32	32.8	32.3	32.6	33.3	32.1608	5	4	5	9	23	（6.95*5.54）	6.95	12.537
11	treatment	27.4	27.11	26.65	26.83	27.1	27.9	28.3	27.9	28.1	27.8	27.3	27.3	27.4	27.4685	2	5	2	3	12	（11.15*8.07）	11.15	11.498
12	treatment	25.71	25.31	24.78	24.87	24.5	25.8	26.7	27.1	26.8	27.2	27.5	28.1	28.4	26.3669	6	1	2	6	15	（5.87*5.02）	5.87	15.174
13	model	26.38	26.31	26.65	27.46	27.9	28.8	28.1	28.6	28	28.6	28.5	28.6	28.2	27.8538	5	3	1	0	9	（7.02*7.02）	7.02	39.788
14	model	24.61	24.51	24.95	26.12	25.9	26.8	27.4	28.6	27.3	28.3	28.4	28.7	28.8	26.9531	5	3	1	0	9	（7.46*9.23）	7.46	12.036
15	model	30.51	31.02	31.04	32.09	31	31.4	31.6	31.9	32.1	33	32.1	32	32.5	31.7123	2	1	3	1	7	（9.81*6，23）	9.81	11.59
16	treatment	27.58	27.76	27.18	27.09	26.7	27.1	27.3	27.1	27	27.2	27.4	27.6	27.7	27.2854	0	0	9	1	10	（10.10*10.10）	10.1	12.092
17	model	28.35	28.76	28.7	29.31	29.3	30.2	30.1	30.1	30.3	30.8	30.8	31.2	31.1	29.9246	3	5	3	2	13	（10.75*10.05）	10.75	6.041
18	model	23.06	23.41	23.27	24.3	33.8	24.5	24.7	24.7	24.5	24.9	25.4	25.7	25.7	25.2262	5	6	2	0	13	（5.96*5.96）	5.96	14.06
19	treatment	30.81	31.64	32.38	31.98	32.1	33.9	33.7	34	32.9	33.8	33.7	34.3	33.6	32.9854	2	7	1	6	16	（13.18*12.15）	13.18	8.491
20	treatment	34.61	35.27	34.62	33.01	33	32.7	33	34.1	33.7	34	34.5	34.8	35.2	34.0392	4	3	1	1	9	（9.68*9.04）	9.68	NA
21	model	29.82	30.4	31.75	31.09	30.9	32	32.1	31.6	30.8	31.9	31.5	31.6	32	31.3431	1	5	6	5	17	（13.2*8.88）	13.2	8.881
22	model	31.7	32.04	32.75	32.57	32.8	33.8	33.8	33.8	33.2	34.2	33.7	33.7	34	33.2354	0	2	8	2	12	（8.46*8.25）	8.46	20.701
23	treatment	28.76	29.15	29.47	29.33	29.1	30.4	31.6	31.8	31.8	31.6	31.5	31.9	31.7	30.6238	4	4	1	8	17	（5*4.84）	5	15.062
24	treatment	26.86	27.11	27.56	27.52	27.5	28.4	29.3	3.01	29.1	30	30.7	30.7	31.1	26.8354	2	2	3	3	10	（14.43*14）	14.43	11.498
25	model	29.45	29.54	30.24	30.18	30.3	31.9	32.9	33.1	32.5	32.9	32.7	32.7	32.9	31.6392	3	5	0	1	9	（8.38*7.97）	8.38	12.333
26	model	27.08	27.12	27.78	27.34	27.5	28.1	29.2	30.2	30.4	30.7	30.1	30.3	30.1	28.9169	NA	NA	NA	NA	NA	NA	NA	10.217
27	control	33.45	33.42	33.48	34.52	34.1	34.4	34.7	35.6	35.4	35.9	35.6	36.1	36.5	34.8592	NA	NA	NA	NA	NA	NA	NA	NA
28	control	34.36	33.48	33.42	34.68	34.4	35.2	35.1	35.6	35.4	36.8	37.6	38.1	37.8	35.5338	NA	NA	NA	NA	NA	NA	NA	7.489
29	control	29.36	29.02	29.39	28.92	28.7	29.4	29.2	30	30	30.3	31.3	31.2	30.6	29.7992	NA	NA	NA	NA	NA	NA	NA	8.881
30	control	30.95	31.68	30.62	31.93	32.9	32.7	33.1	33.9	33.7	33.9	34.8	35.7	35.4	33.1754	NA	NA	NA	NA	NA	NA	NA	7.6
31	control	32.31	32.27	32.53	33.33	33.4	33.8	33.8	35	35.8	35.9	35.6	37.5	37.6	34.5262	NA	NA	NA	NA	NA	NA	NA	8.714
32	control	28.76	28.76	30.06	29.44	29.6	29.3	29.3	30.1	29.5	30.5	30.4	31.3	30.8	29.8323	NA	NA	NA	NA	NA	NA	NA	6.932
33	control	29.92	31.16	31.18	32.75	30.8	31.8	32.4	31.6	32.4	32.7	32.3	32.4	32	31.8008	NA	NA	NA	NA	NA	NA	NA	6.041
34	control	30.56	30.54	30.13	30.92	31	31.3	31.8	31.7	31.7	32.6	32.2	死亡	NA	NA	NA	NA	NA	NA	NA	NA	NA	NA
35	control	32.8	33.01	34.31	35.21	36.2	36.6	37.5	38.4	39	40.1	40.9	41.7	42.1	37.5254	NA	NA	NA	NA	NA	NA	NA	4.983
36	control	27.58	28.3	28	27.74	27.3	28.1	27.9	28.7	28.4	30.2	30.9	31.3	30.6	28.8477	NA	NA	NA	NA	NA	NA	NA	4.871
37	control	26.97	27.32	27	27.76	27.3	27.6	27.9	28.7	28.6	27.5	29.5	29.6	30.4	28.1654	NA	NA	NA	NA	NA	NA	NA	7.6
38	control	31.1	31.98	32.43	32.38	32.2	32.9	33.6	33.8	34.3	34.7	35.5	35.5	35.1	33.4992	NA	NA	NA	NA	NA	NA	NA	5.317
39	control	24.78	24.61	25.45	25.44	26.1	26	26.2	26.7	26.4	27.4	27.2	27.5	27.6	26.26	NA	NA	NA	NA	NA	NA	NA	NA

## Sheet: Supplementary Table 2
Supplementary Table 2: The abundance of species between the control group and the model group.
Number	Group	Weight
genus	Model	Control
Alloprevotella	14.352	22.6714
Barnesiella	19.2675	15.4973
Bacteroides	13.9269	6.4691
Clostridium XlVa	8.3832	7.26303
Saccharibacteria_genera_incertae_sedis	7.75579	2.89217
Alistipes	4.22243	5.07994
Lactobacillus	3.97089	3.8887
Helicobacter	3.13799	3.3946
Desulfovibrio	2.29397	3.51044
Odoribacter	2.5731	3.25345
Parabacteroides	3.91746	1.83619
Oscillibacter	2.67363	2.50064
Parasutterella	1.80096	3.45034
Flavonifractor	2.85693	1.91211
Paraprevotella	2.50228	1.89922
Olsenella	0.380326	2.06968
Lachnospiracea_incertae_sedis	0.682959	1.80595
Mucispirillum	0.881323	1.03593
Clostridium XlVb	0.775802	1.14411
Clostridium IV	0.970539	0.776156
Other	2.67404	7.6495

## Sheet: Supplementary Table 3
Supplementary Table 3: The abundance of species between the model group and the treatment group.
Number	Group	Weight
genus	Model	Treatment
Barnesiella	20.2356	18.1738
Alloprevotella	14.6715	6.02288
Clostridium XlVa	8.56433	12.0358
Bacteroides	14.2624	6.06869
Saccharibacteria_genera_incertae_sedis	7.93938	9.21
Desulfovibrio	2.34204	12.2021
Alistipes	4.33289	4.05529
Lactobacillus	4.07906	4.38597
Helicobacter	3.20538	5.18699
Parabacteroides	4.02092	2.4294
Odoribacter	2.62877	2.67003
Oscillibacter	2.74823	2.64252
Parasutterella	1.8619	1.9256
Paraprevotella	2.5666	0.507243
Turicibacter	0.197713	3.42044
Clostridium IV	0.998701	1.42205
Mucispirillum	0.896728	1.06724
Roseburia	0.12543	1.88687
Clostridium XlVb	0.7959	0.9936
Eubacterium	0.741998	0.572579
Other	2.7845	3.12089

## Sheet: Supplementary Table 4
Supplementary Table 4: The abundance of Bacteroides and the level of serum IL-10.
Group	Number	Bacteroides	serum IL-10
Control	27	0.00619483	7.489
Control	28	0.022495	8.881
Control	29	0.0147902	7.6
Control	30	0.0186232	8.714
Control	31	0.00886635	6.932
Control	32	0.00820815	6.041
Control	33	0.00588509	4.983
Model	3	0.0581539	22.413
Model	4	0.047855	20.032
Model	8	0.0165324	10.05
Model	9	0.0254375	12.537
Model	13	0.0265603	12.036
Model	14	0.0423184	11.59
Model	15	0.0353492	12.092
Treatment	1	0.0244309	19.406
Treatment	2	0.0141319	10.106
Treatment	5	0.00685303	8.491
Treatment	6	0.00859532	8.547
Treatment	7	0.0208688	12.333
Treatment	10	0.0114991	11.498
Treatment	11	0.0212947	15.174
